# Supplementary material for: Targeting acid sphingomyelinase/ceramide/S1P ameliorates silica-induced pulmonary fibrosis through Hippo/YAP signaling pathway in mice
Source: Research Square preprint supplement (doi:10.21203/rs.3.rs-7052670/v1), 2025-07-30
Supplement: Supplementary file 1 [file 5924fbd35d4d663ea650aeea.docx]

Targeting acid sphingomyelinase/ceramide/S1P ameliorates silica-induced pulmonary fibrosis through Hippo/YAP signaling pathway in mice

Ruimin Ma, Di Sun, Yuanying Wang, Yawen Song, Qiao Ye

**Supplementary materials**

**Methods**

*Histological staining and analysis*

Szapiel's approach was used to assess the level of lung inflammation in HE staining(Szapiel et al. 1979). According to the following criteria: 0 grade: no alveolitis; 1 grade: mild alveolitis, alveolar architecture preserves a good, affected area of less than 20% of the lung area; 2 grades: moderate alveolitis, alveolar architectures are mostly destroyed, affected area involve 20% to 50% of the lung area; 3 grades: severe alveolitis, alveolar architectures are destroyed, affected area involve more than 50% of the lung area.

The pulmonary fibrosis on Masson was scored on staining Using King’s method(KING 1952). The scores of silicon nodules were defined as follows: Grade Ⅰ: no obvious silicon nodules formed, and there were a large number of inflammatory cells; Grade Ⅱ: cellular silicon nodules are mainly composed of inflammatory cells; Grade Ⅲ: the cell composition in the center of silicon nodule decreased, and the collagen composition increased gradually; Grade Ⅳ: the cell composition in the center of silicon nodule decreased and the collagen composition increased than Grade Ⅲ; Grade Ⅴ: the center of silicon nodule has no cell component and concentric circle structure formation.

Grade Ⅰ-Ⅴ was assigned 1-5 scores one by one. The fibrosis score formula was calculated as follows: FS= SI/St*1+ SⅡ/St*2+SⅢ/St*3+SⅣ/St*4+SⅤ/St*5 SI, SⅡ, SⅢ, SⅣ, and SⅤ represent the area of silicon nodule, St represents the total lung area.

**References:**

Szapiel, S.V., Elson, N.A., Fulmer, J.D., Hunninghake, G.W. and Crystal, R.G. (1979) Bleomycin-induced interstitial pulmonary disease in the nude, athymic mouse. Am Rev Respir Dis 120, 893-899.

KING, E.J. (1952) Silicosis. Lect Sci Basis Med 2, 108-138.

Table S1 Primers for quantitative real-timed PCR

| Gene |  | Sequence 5’----3’(Mouse) |
| --- | --- | --- |
| β-actin | Foward | GTGACGTTGACATCCGTAAAGA |
|  | Reverse | GCCGGACTCATCGTACTCC |
| ACTA2 | Foward | CGTGGCTATTCCTTCGTGACTACTG |
|  | Reverse | CGTCAGGCAGTTCGTAGCTCTTC |
| COL1A1 | Foward | CCAAGAAGACATCCCTGAAGTCA |
|  | Reverse | TGCACGTCATCGCACACA |
| Fibronectin | Foward | CCCTATCTCTGATACCGTTGTCC |
|  | Reverse | TGCCGCAACTACTGTGATTCGG |
| SMPD1 | Foward | CTCGAGAAACCTATGGACTTCC |
|  | Reverse | TCTGGAAGAGTTGCTCATCATC |
| YAP | Foward | ACCCTCGTTTTGCCATGAAC |
|  | Reverse | TGTGCTGGGATTGATATTCCGTA |
| TAZ | Foward | ATCAGCCTCTGAATCATGTGAA |
|  | Reverse | TTGGTGATTCATTGCGAGATTC |

| Table S2 Primary antibodies for Western blot | | | |  | |
| --- | --- | --- | --- | --- | --- |
| Antibodies | Cat No. | Manufacturer | Sources of species | |
| GAPDH | G0100 | LABLEAD | Mouse | |
| α-SMA | 19245 | CST | Rabbit | |
| COL1A1 | 72026 | CST | Rabbit | |
| SMPD1 | 14609 | Proteintech | Rabbit | |
| YAP | 14074 | CST | Rabbit | |
| TAZ | 66500 | Proteintech | Mouse | |
| p-YAP | 13008 | CST | Rabbit | |


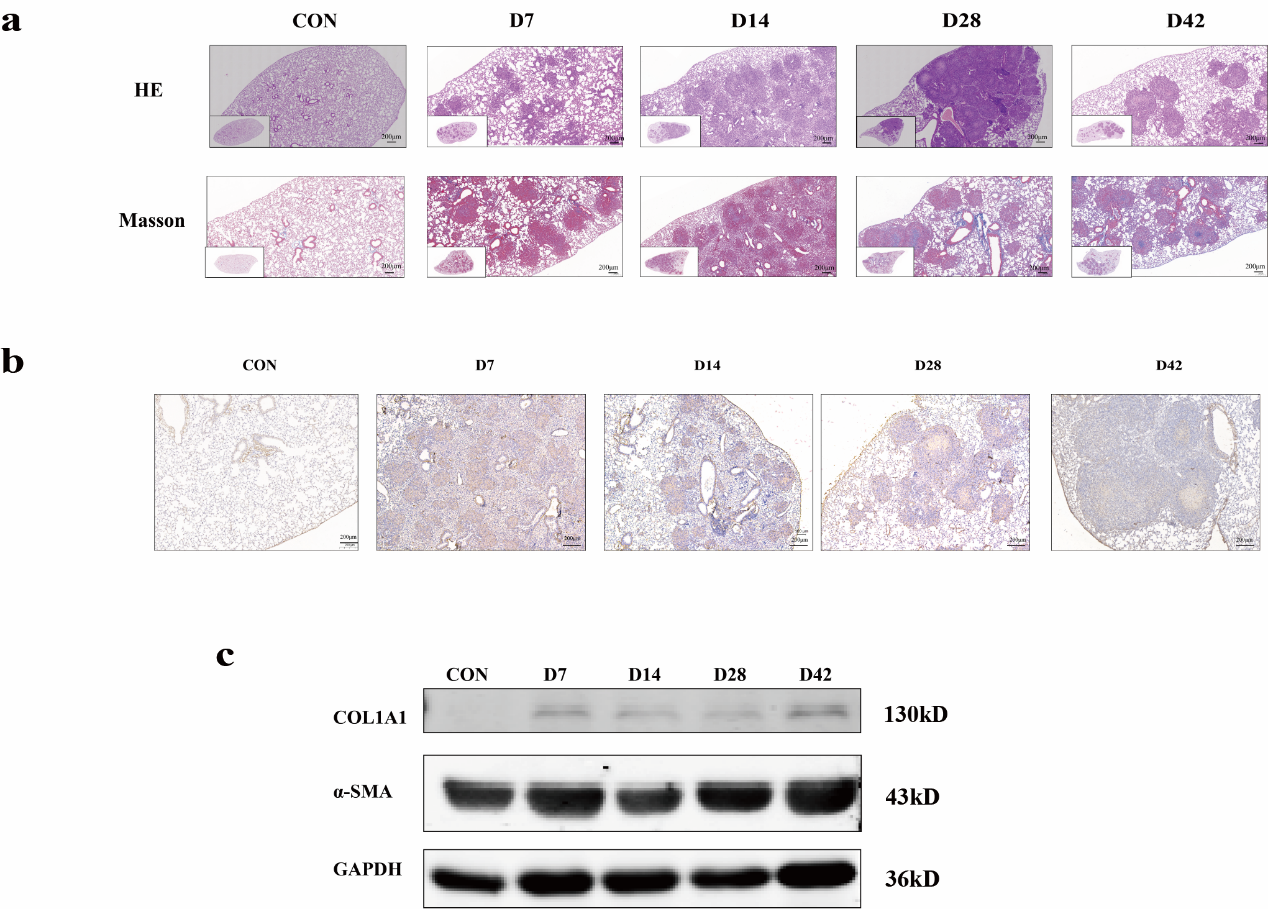
 Figure 1. The pulmonary inflammation and fibrosis in silica-induced pulmonary fibrosis. a, HE staining and Masson staining in lung tissues from different days (n = 8 for each group). b, Images of immunohistochemical staining of COL1A1 in lung tissues from different days. c, Western blots of COL1A1 and α-SMA of lung tissue. Magnification, ×50. Scale bar indicates 200 µm. **P* < 0.05, ***P* < 0.01


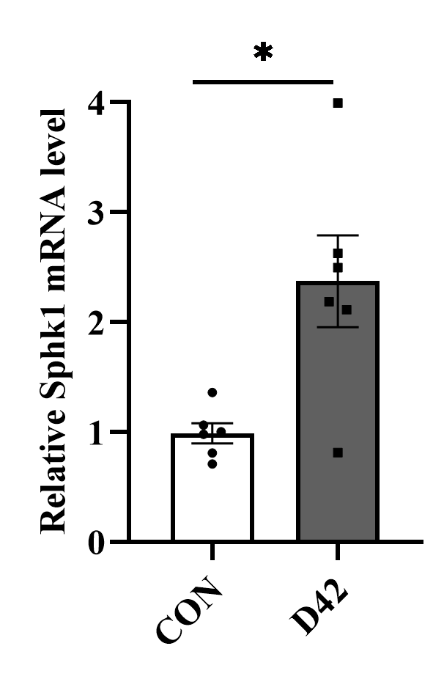


Figure 2. Effects of silica exposure on Sphk1. The mRNA expression of Sphk1 was tested in the lung tissue. ***P* < 0.01


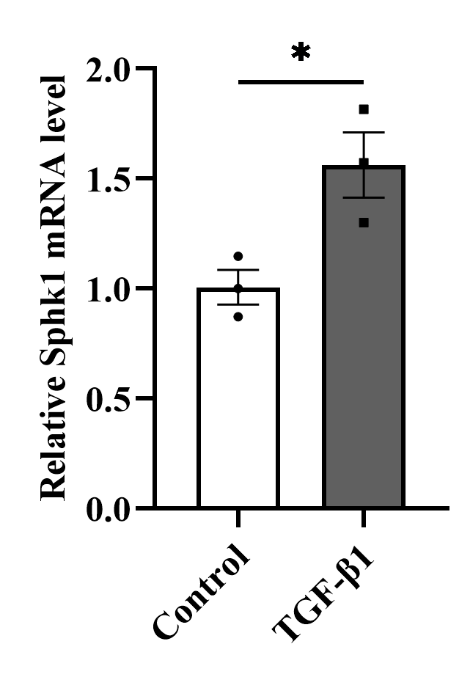


Figure 3. Effects on Sphk1 in the aSMase/Cer/S1P signaling pathway in vitro model. mRNA expression of Sphk1 in NIH-3T3 cells treated with TGF-β1 (2.5 ng/mL, 24h).


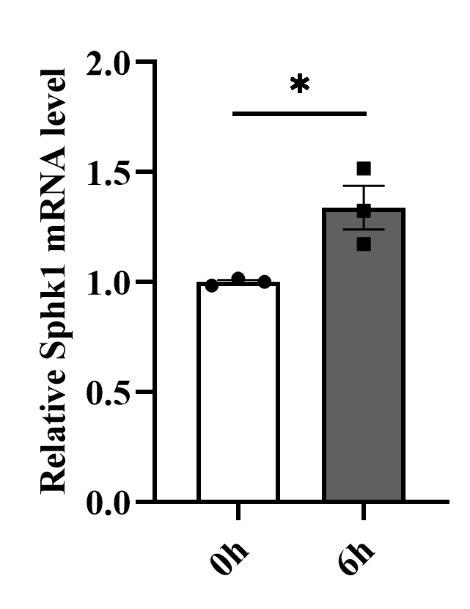


Figure 4. Expression analysis of metabolites and key enzymes in the aSMase/Cer/S1P signaling pathway in the co-culture model. mRNA expression of Sphk1 in the co-culture model (100 μg/mL, 6h). **P* < 0.05


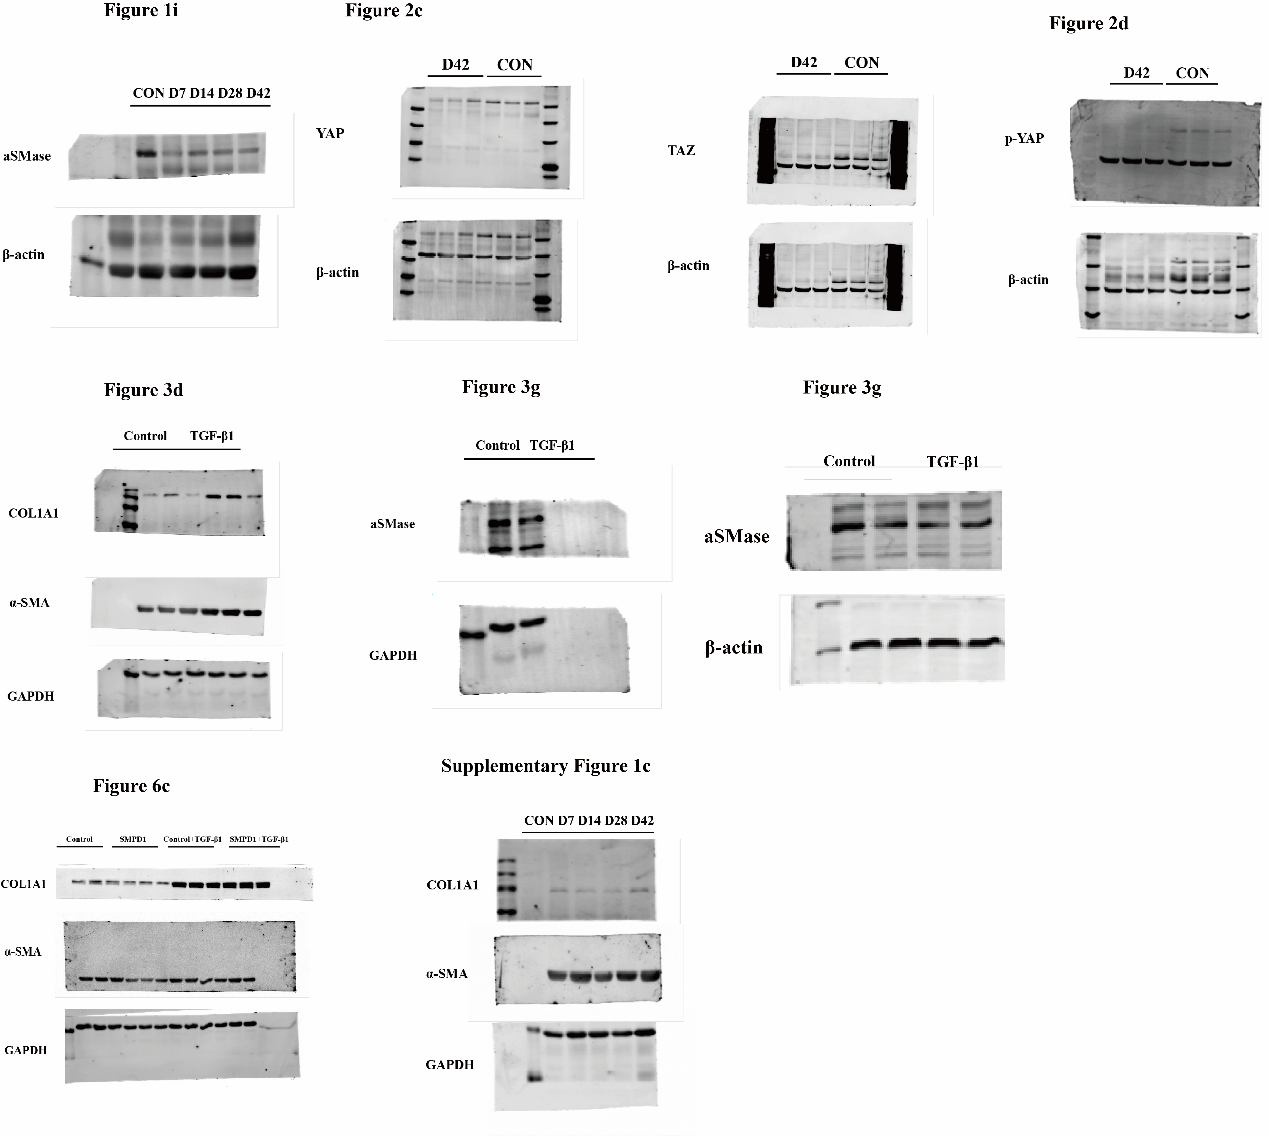
Figure 5. Uncropped scans of the western blots presented in main figures as indicated
